# Supplementary material for: Antimicrobial Use in Brazilian Swine Herds: Assessment of Use and Reduction Examples
Source: MDPI journal article supplement (doi:10.3390/microorganisms9040881), 2021-04-20
Supplement: s1 [file s1]

**Table S1:** Biosecurity questionnaire

**BIOSECURITY QUESTIONNAIRE**

**FARM NAME:**

**AUDITOR:**

**FARM CHARACTERISTICS:**

**DATE:**

**SITE CHARACTERISTICS:**

**COMMENTS:**

| ASPECT                                                          | Adequate  | Need adjust | Inappropriate |
|-----------------------------------------------------------------|-----------|-------------|---------------|
| <b>EDUCATION</b>                                                | <b>10</b> | <b>5</b>    | <b>0</b>      |
| Presence of Biosecurity Program                                 |           |             |               |
| Presence of SOP related with Biosecurity                        |           |             |               |
| Perform Biosecurity Audit (Frequency)                           |           |             |               |
| Training of Employees                                           |           |             |               |
| <b>SITE</b>                                                     |           |             |               |
| Pig Farm Proximity (< 3.0 km distance)                          |           |             |               |
| Farms positive to FMD, PRV, CSF, PRRS                           |           |             |               |
| Slaughterhouse Proximity (< 3.0 km distance)                    |           |             |               |
| Pig Farm Density (< 1000 heads / 1000-5000 / > 5000 heads)      |           |             |               |
| Road Traffic (light / medium / high)                            |           |             |               |
| Presence of other animals around the farm (goat, sheep, cattle) |           |             |               |
| Presence of other animals inside the farm (dog, cat)            |           |             |               |
| Presence of "Green Belt"                                        |           |             |               |
| Presence and maintenance of fences                              |           |             |               |
| Presence of Biosecurity Signs                                   |           |             |               |
| Policy of Entrance Gates                                        |           |             |               |

|                  |  |  |  |
|------------------|--|--|--|
| <b>PERSONNEL</b> |  |  |  |
| Visitor Book     |  |  |  |
| Downtime policy  |  |  |  |

|                                                                                    |  |  |  |
|------------------------------------------------------------------------------------|--|--|--|
| Employees are allowed to raise their own animals                                   |  |  |  |
| Shower-in and shower-out policy                                                    |  |  |  |
| Cleaning and maintenance of shower area                                            |  |  |  |
| Stablished clean and dirty lines                                                   |  |  |  |
| "Danish System" (no shower, just coveralls, boots and wash hands)                  |  |  |  |
| Personal belongings are allowed inside the farm                                    |  |  |  |
| Clothing and boots provided                                                        |  |  |  |
| Pork meat allowed in the site                                                      |  |  |  |
| Contact or cross-traffic between drivers and farm employees during load procedures |  |  |  |
| <b>ISOLATION OF INCOMING ANIMALS</b>                                               |  |  |  |
| Distance of Isolation facilities from barns (> 500 meters)                         |  |  |  |
| Isolation period > 30 days                                                         |  |  |  |
| Shower-in and shower-out policy                                                    |  |  |  |
| Personnel movement                                                                 |  |  |  |
| Transport to Isolation                                                             |  |  |  |
| Testing procedures                                                                 |  |  |  |
| ELISA tests performed (PRRS, <i>Mycoplasma</i> ,...)                               |  |  |  |
| PCR tests performed (PRRS, <i>Mycoplasma</i> , CSF, PRV...)                        |  |  |  |
| Health Status of Incoming Animals                                                  |  |  |  |
| Source of Incoming Animals (more than one)                                         |  |  |  |
| Frequency of Incoming Animals                                                      |  |  |  |
| Transported on dedicated trailers                                                  |  |  |  |

|                                                            |  |  |  |
|------------------------------------------------------------|--|--|--|
| <b>EQUIPMENT / SUPPLIES</b>                                |  |  |  |
| UV light or Disinfection Chamber present                   |  |  |  |
| UV light or Disinfection Chamber properly operated         |  |  |  |
| Equipment/Supplies shared between farms                    |  |  |  |
| Frequency of supply delivery                               |  |  |  |
| Supply delivery follow health pyramid                      |  |  |  |
| Supply delivered in dedicated trailers                     |  |  |  |
| <b>PEST CONTROL</b>                                        |  |  |  |
| Rodent control                                             |  |  |  |
| Bait stations every 15-20 meters                           |  |  |  |
| Bait stations filled                                       |  |  |  |
| Bait log current                                           |  |  |  |
| Insect (cockroaches, flies) control                        |  |  |  |
| Bird proof                                                 |  |  |  |
| Feed bins lids closed                                      |  |  |  |
| Feed spills are being cleaned-up                           |  |  |  |
| Maintenance of area around the barns (grass/weeds/garbage) |  |  |  |
| Standing water drained around the farm                     |  |  |  |
| <b>SEMEN</b>                                               |  |  |  |
| Produced in the same site                                  |  |  |  |
| Delivered to separate location                             |  |  |  |
| Semen is being delivered via the double bag technique      |  |  |  |
| Sanitary monitory frequency (Which diseases?)              |  |  |  |
| <b>WATER</b>                                               |  |  |  |
| Water source (deep well, shallow well, surface)            |  |  |  |
| Water storage                                              |  |  |  |
| Water treatment (chorine, hydrogen peroxide)               |  |  |  |
| System cleanup frequency                                   |  |  |  |
| Water analysis frequency                                   |  |  |  |

|                                                                                                        |  |  |  |
|--------------------------------------------------------------------------------------------------------|--|--|--|
| <b>AIR</b>                                                                                             |  |  |  |
| Filtered farm (management of filters)                                                                  |  |  |  |
| <b>ANIMAL TRANSPORT</b>                                                                                |  |  |  |
| Drivers have received biosecurity training                                                             |  |  |  |
| Drivers have used clean coverall, boots and gloves for each delivery                                   |  |  |  |
| Drivers raise their own pigs                                                                           |  |  |  |
| Trucks and trailers have been properly cleaned, washed, disinfected and dried                          |  |  |  |
| Detergent used (product, concentration, dilution)                                                      |  |  |  |
| Disinfectant used (product, concentration, dilution)                                                   |  |  |  |
| Truck / Trailer downtime followed                                                                      |  |  |  |
| Delivery follow health status of sites                                                                 |  |  |  |
| Transport log completed                                                                                |  |  |  |
| Truck / Trailer swabbing (frequency)                                                                   |  |  |  |
| Lines of separation are observed in loading chutes area                                                |  |  |  |
| Loading chutes are being cleaned and disinfected prior and after each use (and prior to receive stock) |  |  |  |
| <b>INTERNAL TRANSPORT (GILTS OR CULLS)</b>                                                             |  |  |  |
| Drivers have received biosecurity training                                                             |  |  |  |
| Transport log completed                                                                                |  |  |  |
| Cleaning and disinfection procedure (frequency, product, concentration, dilution)                      |  |  |  |
| Trailer stored or covered                                                                              |  |  |  |
| <b>FEED DELIVERY TRANSPORT</b>                                                                         |  |  |  |
| Drivers have received biosecurity training                                                             |  |  |  |
| Drivers raise their own pigs                                                                           |  |  |  |
| Delivery outside fence                                                                                 |  |  |  |
| Plastic boots utilized                                                                                 |  |  |  |
| Bag delivery acceptable                                                                                |  |  |  |
| Dedicated trucks and trailers                                                                          |  |  |  |
| Truck / Trailer downtime followed                                                                      |  |  |  |

|                                                                                                                              |  |  |  |
|------------------------------------------------------------------------------------------------------------------------------|--|--|--|
| Delivery follow health status of sites                                                                                       |  |  |  |
| Transport log completed                                                                                                      |  |  |  |
| Cleaning and disinfection procedure (frequency, product, concentration, dilution)                                            |  |  |  |
| <b>GENERAL MANagements</b>                                                                                                   |  |  |  |
| Cleaning / Disinfection of tools used during piglets processing                                                              |  |  |  |
| Wash hands between litters                                                                                                   |  |  |  |
| Boot bath management                                                                                                         |  |  |  |
| Cleaning and disinfection procedure in Farrowing (frequency, product, concentration, dilution)                               |  |  |  |
| Cleaning and disinfection procedure in Nursery and Finishers (frequency, product, concentration, dilution)                   |  |  |  |
| Respect downtime of facilities between batches                                                                               |  |  |  |
| Adopt all-in all-out procedure                                                                                               |  |  |  |
| Frequency of needles change during main herd vaccination                                                                     |  |  |  |
| Frequency of needles change during main herd medication                                                                      |  |  |  |
| Frequency of needles change during piglets vaccination                                                                       |  |  |  |
| Frequency of needles change during piglets medication                                                                        |  |  |  |
| Vaccination program                                                                                                          |  |  |  |
| Quality control of vaccines                                                                                                  |  |  |  |
| Medicines storage                                                                                                            |  |  |  |
| Medicines in use (injectable, water and feed)                                                                                |  |  |  |
| Feed bins maintenance                                                                                                        |  |  |  |
| Electrical meter reading - outside perimeter                                                                                 |  |  |  |
| <b>DEAD DISPOSAL</b>                                                                                                         |  |  |  |
| Removal frequency                                                                                                            |  |  |  |
| Only designated area is used to remove mortality and it's properly cleaned and disinfected after use                         |  |  |  |
| Physical contact back into the farm from tractor, dead cart, buckets, clothing or other equipment used for mortality removal |  |  |  |
| Equipment cleaned and disinfected each time it goes to the dumpster / cooler                                                 |  |  |  |

|                                                                 |          |          |          |
|-----------------------------------------------------------------|----------|----------|----------|
| Farm staff do not re-enter the farm after completing dead run   |          |          |          |
| System properly used (Incineration / Compost / Rendering / Pit) |          |          |          |
| <b>GARBAGE PICK-UP</b>                                          |          |          |          |
| Frequency                                                       |          |          |          |
| Dumpster location outside                                       |          |          |          |
| <b>EFFLUENT MANAGEMENT</b>                                      |          |          |          |
| Reponsible personnel have received biosecurity training         |          |          |          |
| System properly used (Pit / Lagoon / Biogas)                    |          |          |          |
| Gutter flush                                                    |          |          |          |
| Presence of erosion                                             |          |          |          |
| Effluent distribution (field or other system)                   |          |          |          |
| <b>TOTAL</b>                                                    | <b>0</b> | <b>0</b> | <b>0</b> |

| SCORE SYSTEM |                     |
|--------------|---------------------|
| PONTUATION   | RISK LEVEL          |
| 0-300        | Extremely high risk |
| 301-600      | Really high risk    |
| 601-900      | High risk           |
| 901-1000     | Medium high risk    |
| 1001-1100    | Medium risk         |
| 1101-1200    | Low risk            |
